# Supplementary material for: MDP-based handover policy in wireless relay systems
Source: Springer Nature journal article supplement (doi:10.1186/1687-1499-2012-358), 2012-11-29

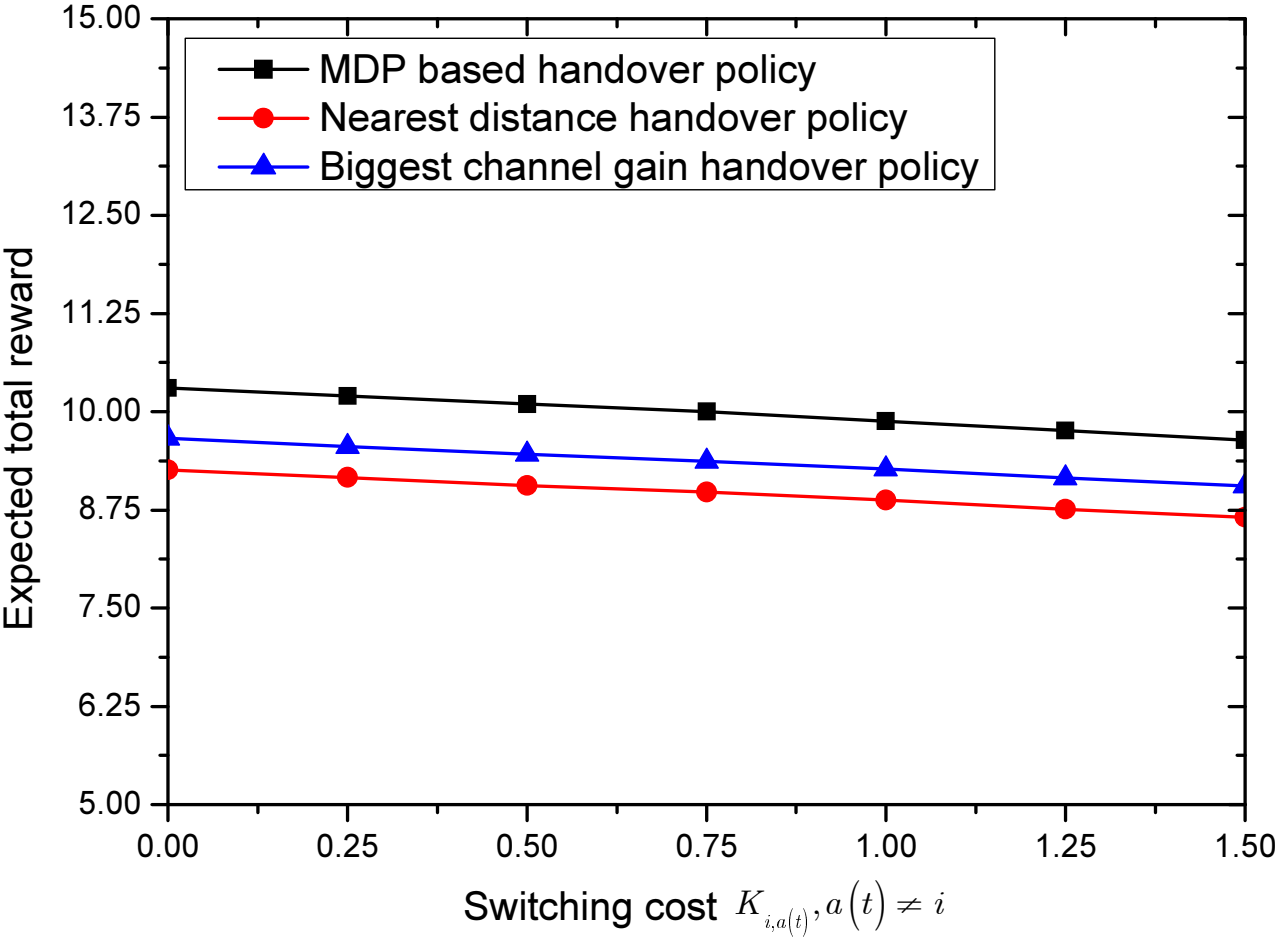

Supplement: 13638_2012_574_MOESM8_ESM.pdf [file 13638_2012_574_MOESM8_ESM.pdf]
